# Supplementary material for: Significantly improving the solubility of non-steroidal anti-inflammatory drugs in deep eutectic solvents for potential non-aqueous liquid administration
Source: Royal Society of Chemistry journal article supplement (doi:10.1039/c5md00551e), 2016-01-01
Supplement: c5md00551e1.pdf [file c5md00551e1.pdf]

## Electronic Supplementary information

### Significantly improving the solubility of non-steroidal anti-inflammatory drugs in deep eutectic solvents for potential nonaqueous liquid administration

Chao Lu<sup>a</sup>, Jun Cao<sup>a</sup>, Ning Wang<sup>a</sup>, Erzhen Su<sup>a,b,c,\*</sup>

<sup>a</sup>Enzyme and Fermentation Technology Laboratory, College of Light Industry Science and Engineering, Nanjing Forestry University, Nanjing 210037, China.

<sup>b</sup>State Key Laboratory of Bioreactor Engineering, East China University of Science and Technology, Shanghai 200237, China.

<sup>c</sup>State Key Laboratory of Pulp and Paper Engineering, South China University of Technology, Guangzhou 510640, China.

#### Table of contents

|                                                                                 |             |
|---------------------------------------------------------------------------------|-------------|
| <b>Experimental section</b>                                                     | <b>ESI1</b> |
| 1.1 Materials                                                                   |             |
| 1.2 Preparation of DESs for dissolving NSAIDs                                   |             |
| 1.3 Dissolution of NSAIDs in DESs, and HPLC analysis                            |             |
| 1.4 Thermal stability of aspirin dissolving in DES, water and DES/water mixture |             |
| <b>Other supporting tables and figures</b>                                      | <b>ESI2</b> |

## **ESI1. Experimental section**

### **1.1 Materials**

All chemicals and reagents were of analytical reagent grade and used without further purification. HPLC-grade methanol was purchased from Tedia Company Inc (Ohio, USA). HPLC-grade water was obtained with a Milli-Q system (Millipore, Bedford, MA, USA). Aspirin was bought from Alfa Aesar (MA, USA). Acetaminophen was obtained from Sigma-Aldrich (MO, USA). Ketoprofen, naproxen and ibuprofen were bought from TCI (Shanghai, China).

### **1.2 Preparation of DESs for dissolving NSAIDs**

DESs were prepared following the method described by Abbot et al.<sup>1</sup> In a typical procedure, both the hydrogen bond donor (HBD) and acceptor (HBA) molecules were mixed and heated between 80°C and 110°C at selected mole ratios with constant stirring until homogenous liquids were formed. If the mixture formed turbid liquid after heating for 3h at 110°C, it indicated that the HBA and HBD could not form a DES at selected ratio. After preparation, the DESs were dehydrated by incubating with 3Å molecular sieves for several days before drug solubility experiments.

### **1.3 Dissolution of NSAIDs in DESs, and HPLC analysis**

Solubility tests were carried out by saturating different DESs with an excess of the tested drug in a bottle with a cap, stirring at 300 rpm and 37°C for 24 h. The suspension was then centrifuged at 10,000 rpm for 30 min. Triplicate samples of the supernatant were diluted with HPLC mobile phase to the linear range of the standard curves. The diluted solutions were analyzed using a Waters 2695 HPLC system (Waters Corp., Milford, Massachusetts, USA) equipped with an ODS-BP-C18 column (4.6 mm×200 mm, 5 µm; Dalian Elite Analytical Instruments Co., Ltd, Dalian, China) at wavelength of 220 nm for aspirin and ibuprofen, 263 nm for acetaminophen, ketoprofen and naproxen. Analyses were run at a flow rate of 0.5 mL/min with mobile phase mixtures of 40% (v/v) methanol+60% (v/v) 5 mmol/L ammonium acetate solution for aspirin and acetaminophen, 75% (v/v) methanol+25% (v/v) 5 mmol/L ammonium acetate solution for ketoprofen and naproxen, 40% (v/v) methanol+60% (v/v) phosphate solution with the volume ratio of phosphate to water of 247/3 for ibuprofen. The column temperature was maintained at 25°C, and the injection volume was 10µL. The concentrations of the dissolved drugs were calculated by the standard curves for 5 drugs.

### **1.4 Thermal stability of aspirin dissolving in DES, water and DES/water mixture**

Aspirin was taken as an example to investigate the thermal stability of drug dissolving in DESs. 5 mL DES (choline chloride: 1, 2-propanediol, 1:2) was transferred to a clean vial containing a stir bar. The vial was immersed in an oil bath heated to 80°C, and the DES was stirred at 300 rpm until its temperature reached 80°C. Then, 2.5 mg of aspirin was added to the DES with stirring to ensure the aspirin completely

dissolved in a short time. Sampling was taken at a certain time interval, and the residual concentration of aspirin in DES was analyzed by HPLC. Similar procedures were used to investigate the thermal stability of aspirin in deionized water and water-DES mixture (1:1, v/v).

## ESI2. Other supporting tables and figures

**Table S1 DESs prepared for dissolving NSAIDs**

| Entry               | Abbreviation | Hydrogen bond acceptor | Hydrogen bond donor | Molar ratio | Appearance at 45°C                                           |
|---------------------|--------------|------------------------|---------------------|-------------|--------------------------------------------------------------|
| <b>First group</b>  |              |                        |                     |             |                                                              |
| 1                   | ChCl-G       | Choline chloride       | Glycerol            | 1:2         | Clear liquid                                                 |
| 2                   | ChCl-EG      | Choline chloride       | Ethylene glycol     | 1:2         | Clear liquid                                                 |
| 3                   | ChCl-P       | Choline chloride       | 1, 2-Propanediol    | 1:2         | Clear liquid                                                 |
| 4                   | ChCl-B       | Choline chloride       | 1, 3-Butanediol     | 1:2         | Initially formed a clear liquid, then crystals separated out |
| 5                   | ChCl-X       | Choline chloride       | Xylitol             | 1:1         | Viscous liquid                                               |
| 6                   | ChCl-DS      | Choline chloride       | D-Sorbitol          | 1:1         | Viscous liquid                                               |
| 7                   | ChCl-DG      | Choline chloride       | D-glucose           | 1:1         | Transparent gel                                              |
| 8                   | ChCl-DF      | Choline chloride       | D-Fructose          | 1:1         | Transparent gel                                              |
| 9                   | ChCl-S       | Choline chloride       | Sucrose             | 1:1         | Unable to form a liquid                                      |
| 10                  | ChCl-M       | Choline chloride       | Maltose             | 4:1         | Unable to form a liquid                                      |
| 11                  | ChCl-DM      | Choline chloride       | D-Mannose           | 5:2         | Unable to form a liquid                                      |
| 12                  | ChCl-GA1     | Choline chloride       | Glutaric acid       | 1:1         | Clear liquid                                                 |
| 13                  | ChCl-GA2     | Choline chloride       | Glycolic acid       | 1:1         | Clear liquid                                                 |
| 14                  | ChCl-MA1     | Choline chloride       | Malonic acid        | 1:1         | Clear liquid                                                 |
| 15                  | ChCl-OA      | Choline chloride       | Oxalic acid         | 1:1         | Clear liquid                                                 |
| 16                  | ChCl-MA2     | Choline chloride       | Malic acid          | 1:1         | Viscous liquid                                               |
| 17                  | ChCl-LA1     | Choline chloride       | Levulinic acid      | 1:2         | Clear liquid                                                 |
| 18                  | ChCl-LA2     | Choline chloride       | Lactic acid         | 1:1         | Clear liquid                                                 |
| 19                  | ChCl-CA      | Choline chloride       | Citric acid         | 1:1         | Viscous liquid                                               |
| 20                  | ChCl-TA      | Choline chloride       | L-(+)-Tartaric acid | 2:1         | Viscous liquid                                               |
| 21                  | ChCl-GA3     | Choline chloride       | Glutamic acid       | 1:2         | Unable to form a liquid                                      |
| 22                  | ChCl-MA3     | Choline chloride       | Maleic acid         | 1:1         | Unable to form a liquid                                      |
| 23                  | ChCl-U       | Choline chloride       | Urea                | 1:2         | Clear liquid                                                 |
| <b>Second group</b> |              |                        |                     |             |                                                              |
| 24                  | EAC-EG       | Ethylammonium chloride | Ethylene glycol     | 1:2         | Clear liquid                                                 |
| 25                  | EAC-P        | Ethylammonium chloride | 1,2-Propanediol     | 1:2         | Clear liquid                                                 |
| 26                  | EAC-GA       | Ethylammonium chloride | Glutaric acid       | 1:1         | Initially formed a clear liquid, then crystals separated out |
| 27                  | EAC-MA       | Ethylammonium chloride | Malonic acid        | 1:1         | Initially formed a clear liquid, then crystals separated out |
| 28                  | EAC-LA1      | Ethylammonium chloride | Levulinic acid      | 1:2         | Clear liquid                                                 |
| 29                  | EAC-LA2      | Ethylammonium chloride | Lactic acid         | 1:1         | Clear liquid                                                 |
| 30                  | EAC-U        | Ethylammonium chloride | Urea                | 1:2         | Initially formed a clear liquid, then crystals separated out |

|    |          |                             |                  |     |                                                              |
|----|----------|-----------------------------|------------------|-----|--------------------------------------------------------------|
| 31 | TPAB-EG  | Tetrapropylammonium bromide | Ethylene glycol  | 1:2 | Initially formed a clear liquid, then crystals separated out |
| 32 | TPAB-P   | Tetrapropylammonium bromide | 1, 2-Propanediol | 1:2 | Clear liquid                                                 |
| 33 | TPAB-GA  | Tetrapropylammonium bromide | Glutaric acid    | 1:1 | Viscous liquid                                               |
| 34 | TPAB-MA  | Tetrapropylammonium bromide | Malonic acid     | 1:1 | Unable to form a liquid                                      |
| 35 | TPAB-LA1 | Tetrapropylammonium bromide | Levulinic acid   | 1:2 | Clear liquid                                                 |
| 36 | TPAB-LA2 | Tetrapropylammonium bromide | Lactic acid      | 1:1 | Initially formed a clear liquid, then crystals separated out |
| 37 | TPAB-U   | Tetrapropylammonium bromide | Urea             | 1:2 | Unable to form a liquid                                      |
| 38 | BE-EG    | Betaine                     | Ethylene glycol  | 1:2 | Initially formed a clear liquid, then crystals separated out |
| 39 | BE-P     | Betaine                     | 1,2-Propanediol  | 1:2 | Initially formed a clear liquid, then crystals separated out |
| 40 | BE-GA    | Betaine                     | Glutaric acid    | 1:1 | Unable to form a liquid                                      |
| 41 | BE-MA    | Betaine                     | Malonic acid     | 1:1 | Unable to form a liquid                                      |
| 42 | BE-LA1   | Betaine                     | Levulinic acid   | 1:2 | Clear liquid                                                 |
| 43 | BE-LA2   | Betaine                     | Lactic acid      | 1:1 | Clear liquid                                                 |
| 44 | BE-U     | Betaine                     | Urea             | 1:2 | Initially formed a clear liquid, then crystals separated out |
| 45 | ChBt-EG  | Choline bitartrate          | Ethylene glycol  | 1:2 | Unable to form a liquid                                      |
| 46 | ChBt-P   | Choline bitartrate          | 1,2-Propanediol  | 1:2 | Unable to form a liquid                                      |
| 47 | ChBt-GA  | Choline bitartrate          | Glutaric acid    | 1:1 | Unable to form a liquid                                      |
| 48 | ChBt-MA  | Choline bitartrate          | Malonic acid     | 1:1 | Unable to form a liquid                                      |
| 49 | ChBt-LA1 | Choline bitartrate          | Levulinic acid   | 1:2 | Clear liquid                                                 |
| 50 | ChBt-LA2 | Choline bitartrate          | Lactic acid      | 1:1 | Transparent gel                                              |
| 51 | ChBt-U   | Choline bitartrate          | Urea             | 1:2 | Transparent gel                                              |

**Table S2 The solubility of different NSAIDs in several neat DESs and the latter's physicochemical parameters**

| DESs     | Viscosity (cP) | pH    | $E_{NR}$ | $\beta$ | $\pi^*$ | Solubility (mg/mL) |               |             |            |             |
|----------|----------------|-------|----------|---------|---------|--------------------|---------------|-------------|------------|-------------|
|          |                |       |          |         |         | Aspirin            | Acetaminophen | Ketoprofen  | Naproxen   | Ibuprofen   |
| ChCl-LA1 | 117            | 2.19  | 49.2     | 0.575   | 1.00    | 135.03±0.19        | 278.96±3.20   | 192.85±3.62 | 31.67±0.40 | 78.69±0.93  |
| ChCl-G   | 194            | 5.78  | 49.6     | 0.408   | 1.24    | 42.48±0.81         | 140.33±2.58   | 11.13±0.12  | 3.69±0.04  | 3.82±0.03   |
| ChCl-EG  | 33.5           | 7.00  | 50.5     | 0.480   | 1.19    | 138.96±2.11        | 287.01±4.01   | 81.99±1.07  | 20.68±0.52 | 24.29±0.18  |
| ChCl-U   | 386            | 9.93  | 49.7     | 0.351   | 1.31    | 147.90±2.23        | 169.66±1.98   | 61.00±0.74  | 15.46±0.11 | 4.5±0.01    |
| ChCl-MA1 | 1110           | 0.280 | 47.7     | 0.527   | 1.01    | 126.29±2.06        | 266.25±2.44   | 60.99±0.31  | 21.98±0.21 | 25.87±0.13  |
| BE-LA1   | 451            | 4.68  | 51.1     | 0.485   | 0.984   | 149.82±0.96        | 212.10±1.92   | 329.06±4.42 | 76.64±0.72 | 280.17±2.68 |

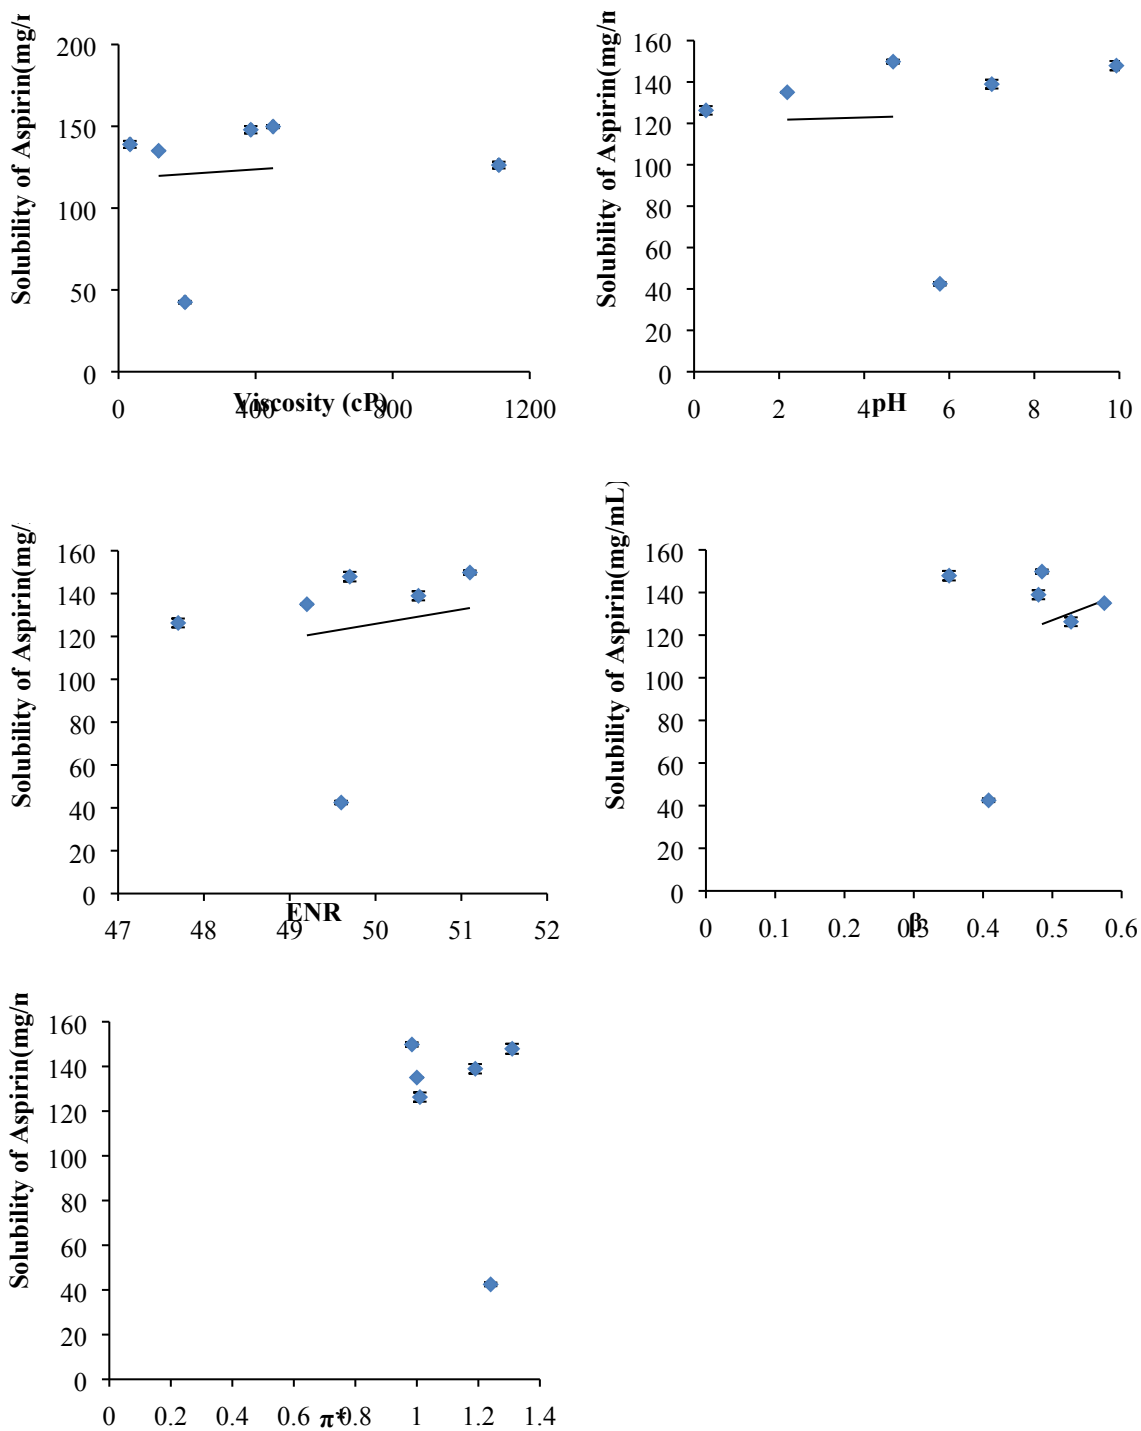

**Figure S1.** Attempts to correlate the aspirin solubility in DESs with the latter's characteristics. (a) viscosity, (b) pH, (c)  $E_{NR}$ , (d)  $\beta$ viscosity, and (e)  $\pi^*$ . The dependences obtained for acetaminophen, ketoprofen, naproxen and ibuprofen were qualitatively similar to those for Aspirin and equally devoid of any discernible correlations.

Reference:

1. A. P. Abbott, D. Boothby, G. Capper, D. L. Davies, R. K. Rasheed, Journal of the American Chemical Society, 2004, **126**, 9142-9147.
